# Supplementary material for: Reverting to a Healthy Diet during Lactation Normalizes Maternal Milk Lipid Content of Diet‐Induced Obese Rats and Prevents Early Alterations in the Plasma Lipidome of the Offspring
Source: PubMed Central journal article supplement — Mol Nutr Food Res. 2022 Jul 13;66(17):2200204. doi: 10.1002/mnfr.202200204 (PMC9541142; doi:10.1002/mnfr.202200204), 2022-07-13
Supplement: MNFR-66-2200204-s001.pdf [file MNFR-66-2200204-s001.pdf]

Dietary improvement during lactation prevents early alterations in the plasma lipidome of the offspring of diet-induced obese rats by normalizing maternal milk lipid content

### Supporting information

**Supplementary Table 1.** Energy values and nutritional composition, in term of fatty acids, of both commercial diets included in the experimental design: standard diet (SD; SAFE A04) and western diet (WD; D12079B RD Western diet, Research Diets).

| Energy values                   | SD     | WD     |
|---------------------------------|--------|--------|
| kcal/kg                         | 3,339  | 4,700  |
| Protein (%)                     | 19.3   | 17.0   |
| Fat (%)                         | 8.4    | 41.0   |
| Carbohydrate (%)                | 72.4   | 43.0   |
| Nutritional composition         | SD     | WD     |
| <i>Fatty acids</i>              | mg/kg  | mg/kg  |
| Palmitic acid (16:0)            | 5,900  | 53,500 |
| Palmitoleic acid (16:1)         | 150    | 4,600  |
| Stearic acid (18:0)             | 600    | 24,500 |
| Oleic acid (18:1)               | 4,800  | 52,700 |
| Linoleic acid (18:2)            | 15,000 | 10,600 |
| $\alpha$ -Linolenic acid (18:3) | 1,200  | 2,900  |

**Supplementary Table 2.** Nucleotide sequences of primers used for PCR amplification

| Gene                           | Forward primer (5' to 3') | Reverse primer (5' to 3') | Amplicon size (pb) |
|--------------------------------|---------------------------|---------------------------|--------------------|
| <i>Gdi</i>                     | CCGCACAAGGCAAATACATC      | GACTCTCTGAACCGTCATCAA     | 210                |
| <i>Srebfl</i>                  | CCCACCCCCTTACACACC        | GCCTGCGGTCTTCATTGT        | 198                |
| <i>Fasn</i>                    | CGGCGAGTCTATGCCACTAT      | ACACAGGGACCGAGTAAT        | 222                |
| <i>Acaca</i>                   | TGCAGGTATCCCCACTCTTC      | TTCTGATTCCCTTCCCTCCT      | 212                |
| <i>Pnpla2</i>                  | TGTGGCCTCATTCCCTCTAC      | AGCCCTGTTTGACATCTCT       | 271                |
| <i>Lipe</i>                    | TCACGCTACATAAAGGCTGCT     | CCACCCGTAAAGAGGGAAGT      | 169                |
| <i>Lpl</i>                     | TATGGCACAGTGGCTGAAAG      | CTGACCAGCGGAAGTAGGAG      | 157                |
| <i>Cd36</i>                    | GTGGCAAAGAACAGCAGCAA      | CCAACAGACAGTGAAGGCTCA     | 161                |
| <i>Fabp4</i>                   | TTGTGGGGACCTGGAAACT       | TCCTGTCATCTGGGGTGATT      | 225                |
| <i>Cpt1b</i>                   | GCAAACCTGGACCGAGAAGAG     | CCTTGAAGAAGCGACCTTTG      | 180                |
| <i>Insr</i>                    | GTCCGGCGTTCATCAGAG        | CTCCTGGGATTCATGCTGTT      | 242                |
| <i>Lepr</i>                    | AGCCAAACAAAAGCACCATT      | TCCTGAGCCATCCAGTCTCT      | 174                |
| <i>Adipoq</i>                  | GCTCAGGATGCTACTGTTG       | TCTCACCCCTTAGGACCAAG      | 241                |
| <i>TNF-<math>\alpha</math></i> | CCGATTTGCCATTTTCATAACC    | TCGCTTCACAGAGCAATGAC      | 230                |
| <i>IL-6</i>                    | TCAACTCCATCTGCCCTTC       | TTGTGGGTGGTATCCCTCTGT     | 156                |
| <i>COX-2</i>                   | TGATGTTTCGATTTCTTTGCC     | GTGTCTTTGACTGTGGGAGGA     | 220                |

**Supplementary Table 3.** Pearson's correlation coefficients and the corresponding P-values between maternal milk and plasma of the offspring at lactation day 15 when analyzing partial triacylglycerol composition, in terms of both number of carbon atoms (C) and double bonds (DB), and free fatty acid profile.

| <b>Triacylglycerol composition</b>        |       | <b>Pearson's correlation coefficient</b> | <b>P-value</b> |
|-------------------------------------------|-------|------------------------------------------|----------------|
| <i>In terms of number of carbon atoms</i> | 30C   | 0.452                                    | 0.006          |
|                                           | 32C   | 0.647                                    | 0.000          |
|                                           | 34C   | 0.672                                    | 0.000          |
|                                           | 36C   | 0.708                                    | 0.000          |
|                                           | 38C   | 0.791                                    | 0.000          |
|                                           | 40C   | 0.810                                    | 0.000          |
|                                           | 42C   | -0.173                                   | 0.314          |
|                                           | 44C   | -0.404                                   | 0.014          |
|                                           | 46C   | 0.019                                    | 0.914          |
|                                           | 48C   | 0.658                                    | 0.000          |
|                                           | 50C   | 0.925                                    | 0.000          |
|                                           | 52C   | 0.946                                    | 0.000          |
|                                           | 54C   | 0.711                                    | 0.000          |
|                                           | 56C   | -0.284                                   | 0.093          |
|                                           | 58C   | 0.138                                    | 0.423          |
| 60C                                       | 0.487 | 0.003                                    |                |
| <i>In terms of double bonds</i>           | 0 DB  | 0.922                                    | 0.000          |
|                                           | 1 DB  | 0.959                                    | 0.000          |
|                                           | 2 DB  | 0.822                                    | 0.000          |
|                                           | 3 DB  | 0.875                                    | 0.000          |
|                                           | 4 DB  | 0.646                                    | 0.000          |
|                                           | 5 DB  | 0.162                                    | 0.346          |
|                                           | 6 DB  | 0.618                                    | 0.000          |
| <b>Free fatty acid profile</b>            |       |                                          |                |
| Palmitoleic acid (C16:1)                  | 0.750 | 0.000                                    |                |
| Oleic acid (C18:1)                        | 0.891 | 0.000                                    |                |
| Linoleic acid (LA, C18:2)                 | 0.769 | 0.000                                    |                |
| $\alpha$ -Linoleic (ALA, C18:3)           | 0.789 | 0.000                                    |                |
| Eicosanoic acid (C20:2)                   | 0.467 | 0.004                                    |                |
| Eicosatrienoic acid (C20:3)               | 0.502 | 0.002                                    |                |
| Arachidonic acid (AA, C20:4)              | 0.444 | 0.007                                    |                |
| Eicosapentaenoic acid (EPA, C20:5)        | 0.649 | 0.000                                    |                |
| Docosatetraenoic acid (C22:4)             | 0.306 | 0.069                                    |                |
| Docosapentaenoic acid (C22:5)             | 0.387 | 0.020                                    |                |
| Docosahexaenoic acid (DHA, C22:6)         | 0.577 | 0.000                                    |                |
| AA/(EPA+DHA) ratio                        | 0.457 | 0.006                                    |                |

**Supplementary Figure 1.** Loadings and scree plots illustrating triacylglycerols in maternal milk at lactation days 5, 10 and 15 (A) and in the plasma of male and female offspring at postnatal day 15 (B). These analyses were performed using MetaboAnalyst 5.0 software (1).

A) Maternal milk

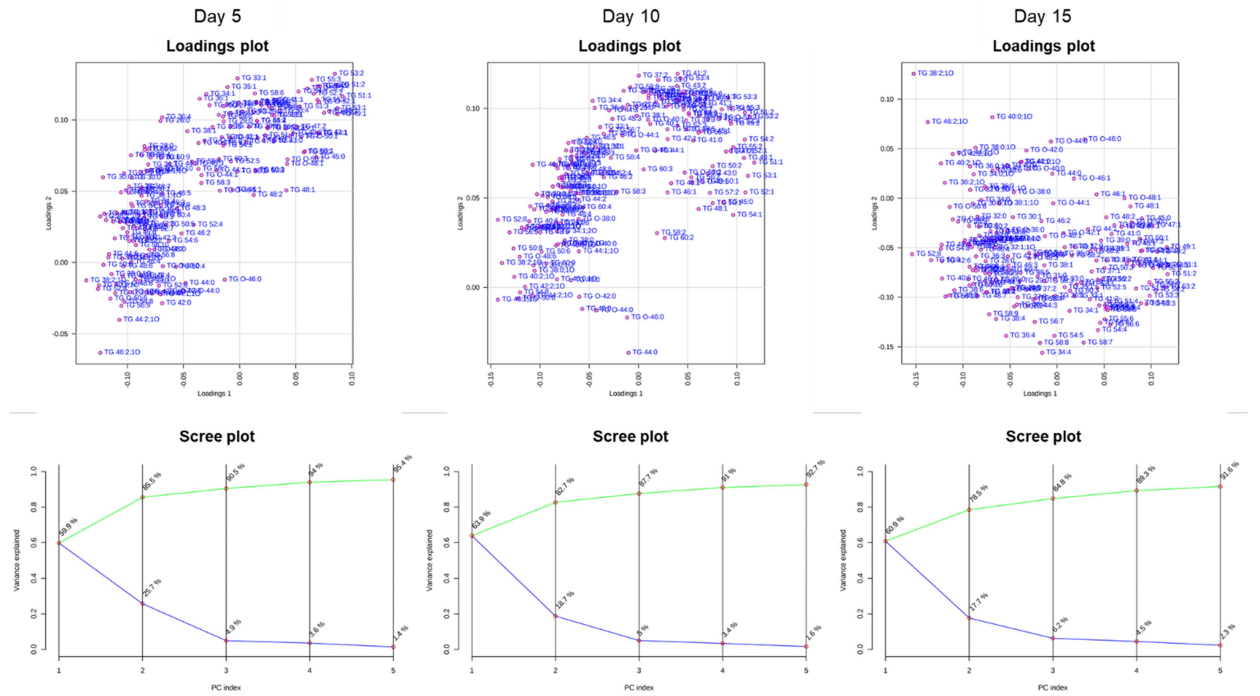

B) Plasma of offspring at postnatal day 15

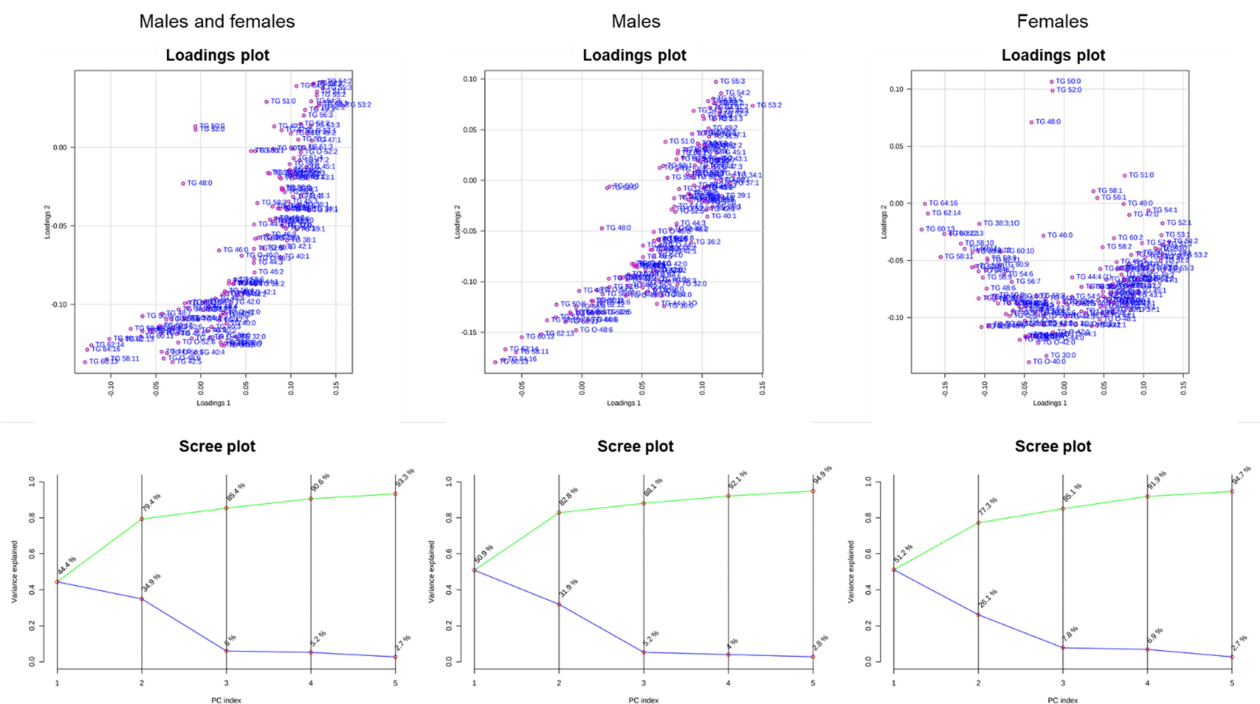

(1) Pang Z, Chong J, Zhou G, De Lima Morais DA, Chang L, Barrette M, et al. MetaboAnalyst 5.0: narrowing the gap between raw spectra and functional insights. *Nucleic Acids Res* **2021**, 49, W388–96.
